# Supplementary material for: Neutrophils are required for both the sensitization and elicitation phase of contact hypersensitivity
Source: PubMed Central journal article supplement — J Exp Med. 2015 Jan 12;212(1):15–22. doi: 10.1084/jem.20130062 (PMC4291534; doi:10.1084/jem.20130062), 2015-01-12
Supplement: supp_jem.20130062_JEM_20130062_sm.pdf [file supp_jem.20130062_JEM_20130062_sm.pdf]

SUPPLEMENTAL MATERIAL

Weber et al., <http://www.jem.org/cgi/content/full/jem.20130062/DC1>

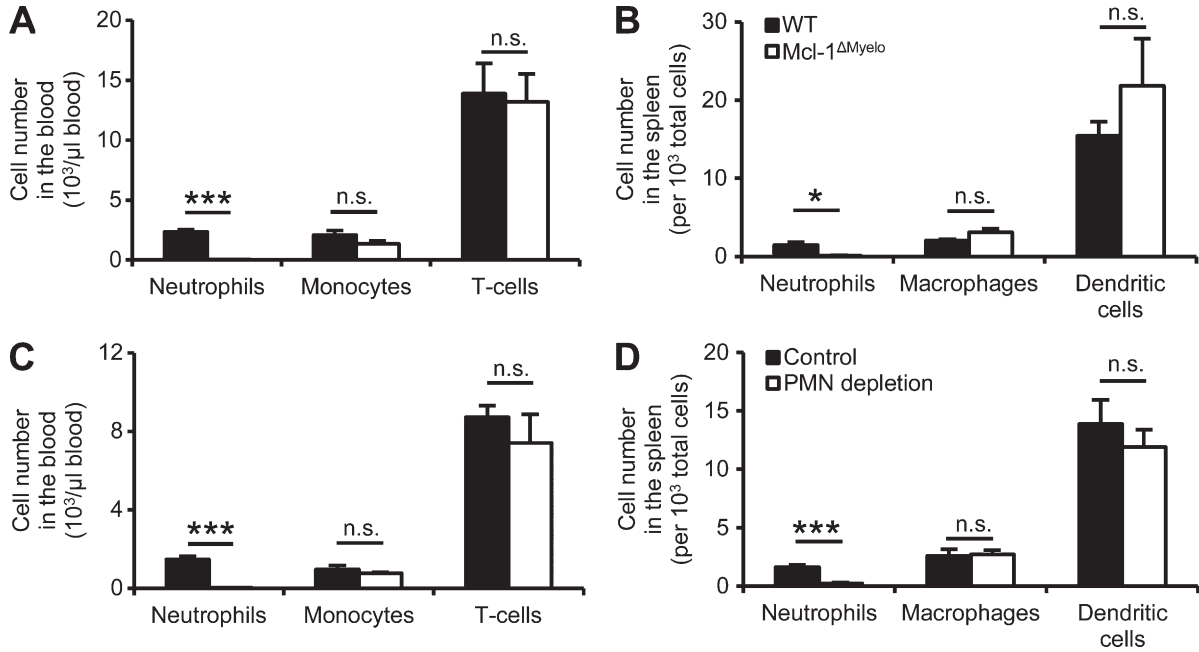

**Figure S1. Leukocyte populations of neutrophil-deficient and neutrophil-depleted mice.** Flow cytometric analysis of different leukocyte populations in the peripheral blood (A and C) or spleen (B and D) of WT and Mcl-1<sup>ΔMyelo</sup> mice (A and B), or neutrophil-depleted (PMN depletion) or control treated mice 24 h after the depletion (C and D). Graphs show mean and SEM from 12–30 (A), 6 (B), 6–7 (C), or 7 (D) mice per group from 7 (A) or 3 (B–D) independent experiments. \*, P < 0.05; \*\*\*, P < 0.002, n.s. means statistically not significant.
